# Supplementary material
Source: publisher figshare collection journal article supplement (https://geolsoc.figshare.com/ndownloader/files/26290728)
Supplement: Supplementary file 1 [file 26290728]

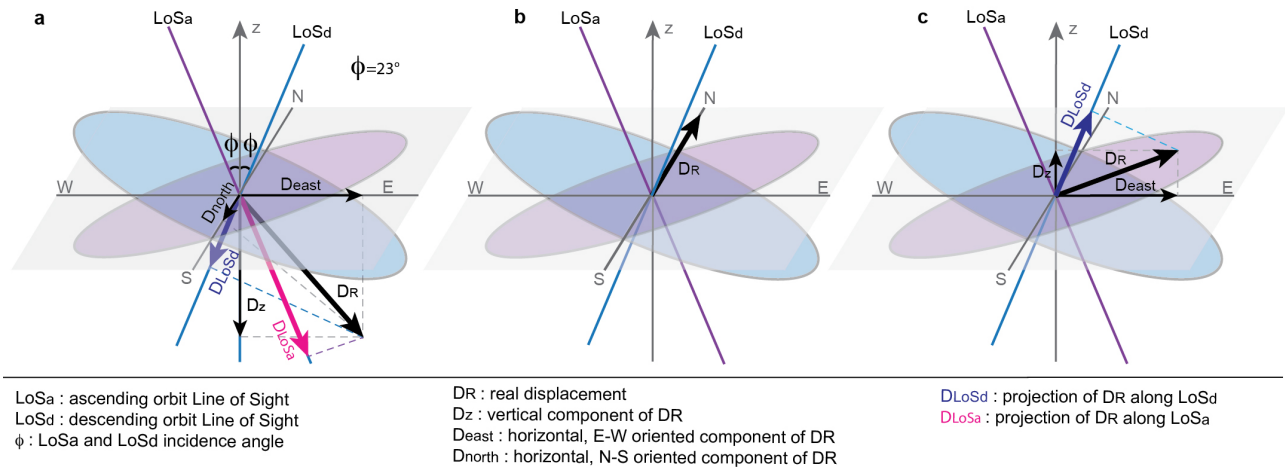

Figure S1. SAR satellites viewing geometry. Satellite Line of Sight along both the ascending and descending orbits (LoSa and LoSb axes, respectively) fall within a nearly vertical plane E-W oriented. Diagrams a to c show examples of displacement detected by SAR along the ascending and descending orbits (DLoSa and DLoSd, respectively) according to variable orientations of “real” ground displacement (DR). Components of real displacement vector in the vertical (Dz) and horizontal (Deast and Dnorth) planes are also shown. a: Real displacement oriented downwards, with related projections along the descending LoS and ascending LoS and its components in the horizontal plane oriented towards both the south and east. b: Displacement in the horizontal plane, oriented towards the north (or south), is not detected by SAR (projections along LoS axes are null). c: Real ground displacement falling in the plane orthogonal to the ascending orbit LoS is detected by SAR only along the descending orbit.
